# Supplementary material for: A novel nitrogen heterocycle platform-based highly selective and sensitive fluorescence chemosensor for the detection of Al3+ and its application in cell imaging
Source: Royal Society of Chemistry journal article supplement (doi:10.1039/c8ra10036e), 2019-01-01
Supplement: c8ra10036e1.pdf [file c8ra10036e1.pdf]

**A novel nitrogen heterocyclic platform based highly selective and sensitive  
fluorescence chemosensor for the detection of Al<sup>3+</sup> and its application in cell  
imaging**

*Zengchen Liu,\* Shujing Li, Genwu Ge, Yanxia Li, Chunxiang Zhao, Hui Zhang,\* Zhiguang Yang*

*College of Chemistry and Chemical Engineering; Henan Key Laboratory of Rare Earth  
Functional Materials; International Joint Research Laboratory for Biomedical Nanomaterials of  
Henan; The Key Laboratory of Rare Earth Functional Materials and Applications, Zhoukou  
Normal University, Zhoukou 466001, P.R. China*

\*Corresponding author. Tel.: +86 0394 8718252; Fax: +86 0394 8178252.

E-mail address: [liuzengchen@zkn.cn](mailto:liuzengchen@zkn.cn)

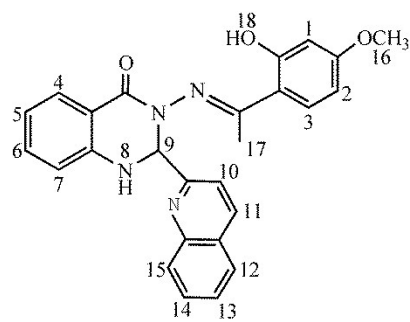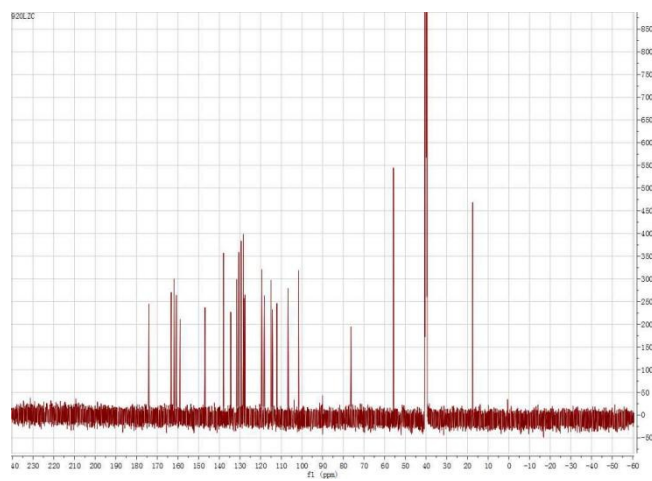

**Fig. S1** The <sup>13</sup>CNMR spectrum of L
